# Supplementary material for: SMC5/6 Promotes Replication Fork Stability via Negative Regulation of the COP9 Signalosome
Source: MDPI journal article supplement (doi:10.3390/ijms25020952), 2024-01-12
Supplement: s1 [file s1]

## Supplementary Materials:

**Supplementary Figure S1.** SMC5/6 is required for replication fork restart following aphidicolin-mediated replication block.

**Supplementary Figure S2.** Fork restart defect upon SMC5/6 loss is MRE11-dependent during aphidicolin-mediated replication block and requires MRE11 endonuclease activity.

**Supplementary Figure S3.** SMC5/6 negatively modulates CSN protein levels.

**Supplementary Table S1:** Antibodies used in this study.

**Supplementary Table S2:** Statistical analyses performed in this study.

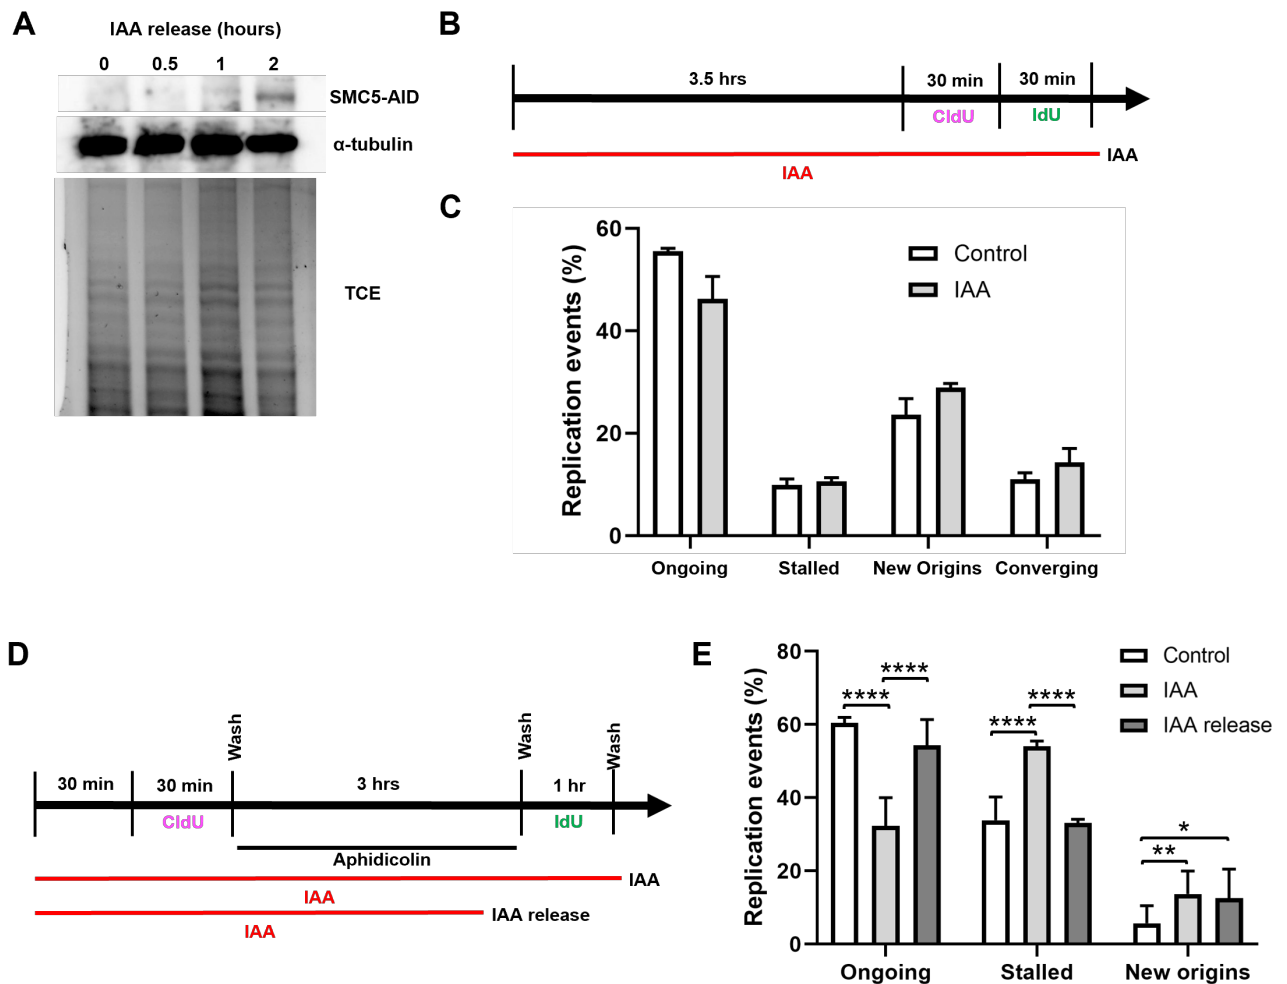

**Supplementary Figure S1.** SMC5/6 is required for replication fork restart following aphidicolin-mediated replication block. (A) Western blot analysis of SMC5-AID protein levels following IAA (100  $\mu$ M) removal for 0, 0.5, 1, and 2 hours, in *Smc5-AID* homozygous mESCs. Alpha-tubulin was used as a loading control, and 2,2,2-Trichloroethanol (TCE) was incorporated in the gel to visualize total loaded protein (lower panel). (B) Schematic of CldU (250  $\mu$ M) and IdU (250  $\mu$ M) labeling following 3.5 hours of IAA treatment. (C) Quantification of replication event frequency in control and IAA conditions. Data represent mean  $\pm$  S.E.M. (control condition: n = 235 fibers, IAA condition: n = 255 fibers). 3 experiments were performed for each condition. (D) Schematic of CldU (250  $\mu$ M) and IdU (250  $\mu$ M) labeling and aphidicolin (15  $\mu$ M) and IAA treatment and release (E) Quantification of replication event frequency in control, IAA, IAA release, and IAA add conditions. Data represent mean  $\pm$  S.E.M. (control condition: n = 276 fibers, IAA condition: n = 289 fibers, IAA release condition: n = 222 fibers). 3 experiments were

performed for each condition. Pearson's Chi-squared test with Yates' continuity correction, \* $p < 0.05$ , \*\* $p < 0.005$ , \*\*\* $p < 0.0001$ . See Supplementary Table S2 for p-values and statistics.

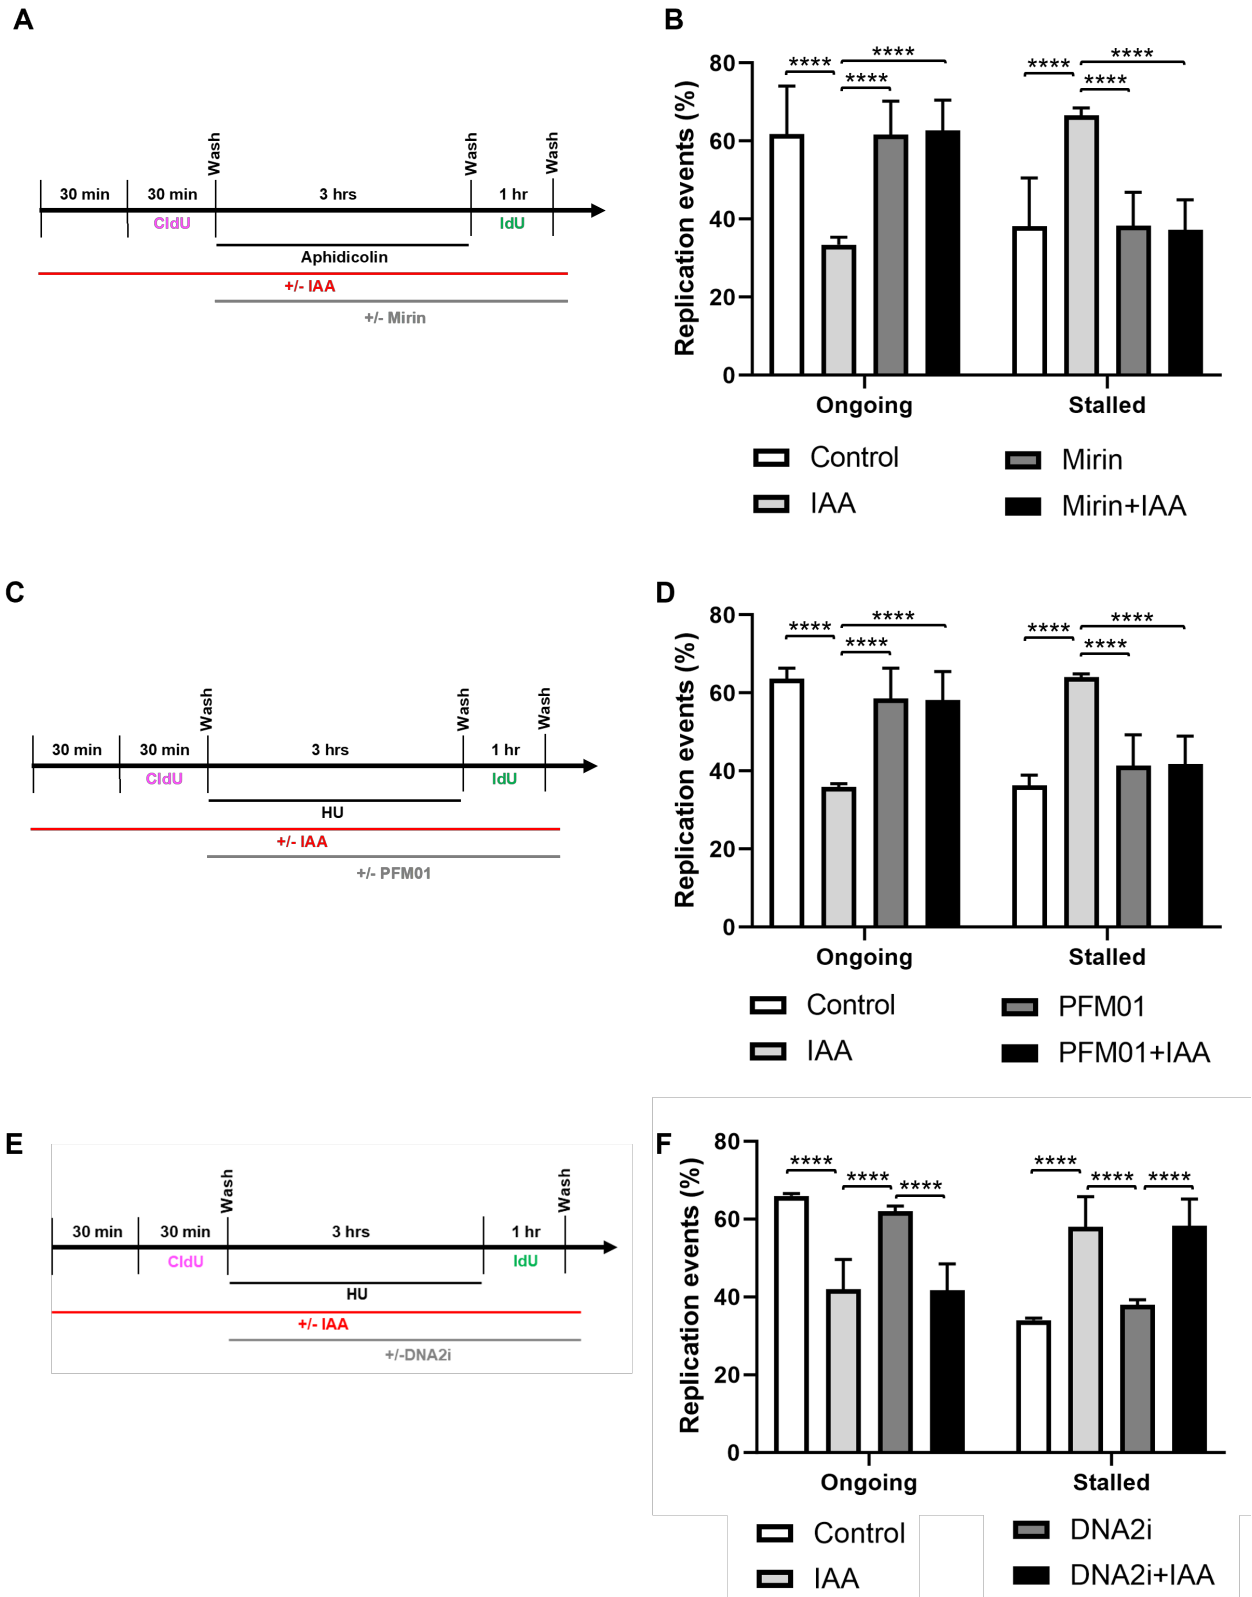

**Supplementary Figure S2.** Fork restart defect upon SMC5/6 loss is MRE11-dependent during aphidicolin-mediated replication block and requires MRE11 endonuclease activity. (A) Schematic of CldU and IdU labeling and aphidicolin, IAA, and mirin (50  $\mu$ M) treatment. (B) Quantification of replication event frequency in control and IAA-treated mESCs, with or without mirin treatment. Data

represent mean  $\pm$  S.E.M. (control condition: n = 498 fibers, mirin condition: n = 499 fibers, IAA condition: n = 500 fibers, mirin+IAA condition: n = 500 fibers). 3 experiments were performed for each condition. Pearson's Chi-squared test with Yates' continuity correction, \*\*\*\*p < 0.0001. (C) Schematic of CldU and IdU labeling and HU, IAA, and PFM01 (10  $\mu$ M) treatment. (D) Quantification of replication event frequency in control and IAA-treated mESCs, with or without PFM01 treatment. Data represent mean  $\pm$  S.E.M. (control condition: n = 409 fibers, PFM01 condition: n = 272 fibers, IAA condition: n = 294 fibers, PFM01+IAA condition: n = 338 fibers). 3 experiments were performed for each condition. Pearson's Chi-squared test with Yates' continuity correction, \*\*\*\*p < 0.0001. (E) Schematic of CldU and IdU labeling and HU, IAA, and DNA2i (10  $\mu$ M) treatment. (F) Quantification of replication event frequency in control and IAA-treated mESCs, with or without DNA2i treatment. Data represent mean  $\pm$  S.E.M. (control condition: n = 121 fibers, DNA2i condition: n = 170 fibers, IAA condition: n = 243 fibers, PFM01+IAA condition: n = 118 fibers). 3 experiments were performed for each condition. Pearson's Chi-squared test with Yates' continuity correction, \*\*\*\*p < 0.0001. See Supplementary Table S2 for p-values and statistics.

**A**

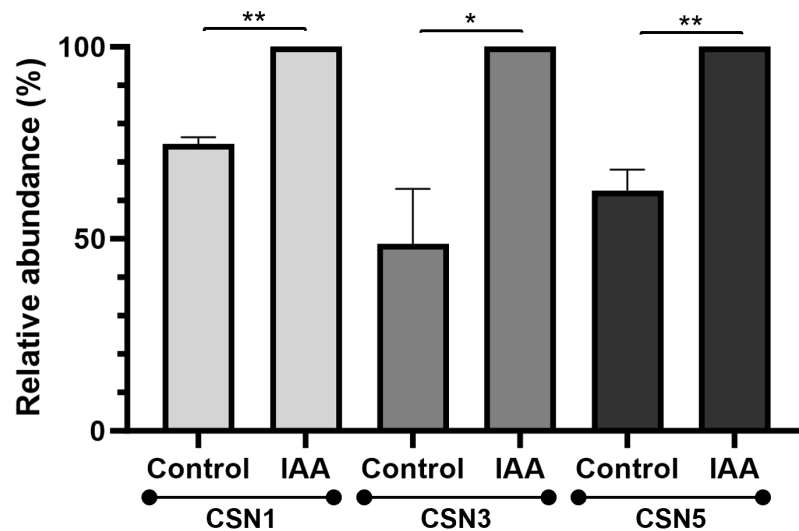

**B**

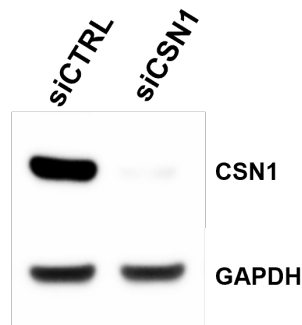

**C**

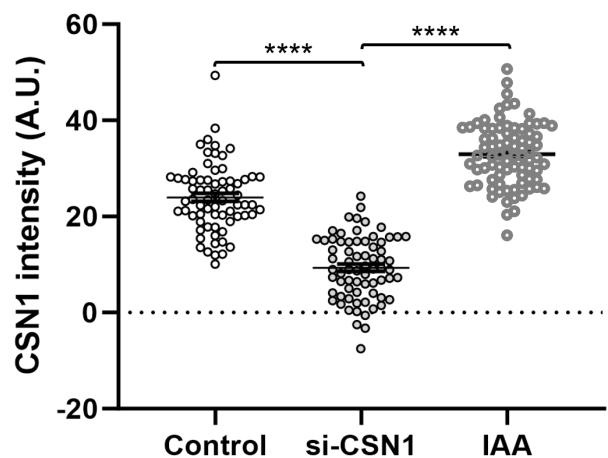

**Supplementary Figure S3. SMC5/6 negatively modulates CSN protein levels.** (A) Quantification of CSN1, CSN3, and CSN5 Western blots for control and IAA conditions using the Band/Peak Quantification Tool on Image J [140]. Western blots were performed in triplicate. Data represent mean  $\pm$  S.E.M. A paired two-tailed t test, \*\* p < 0.005, \* p < 0.05. (B) Western blot of assessment of CSN1 depletion following siRNA treatment. (C) Quantification of average CSN1 intensity in control, siCSN1, and IAA-treated *Smc5-AID* mESCs. Data represent mean  $\pm$  S.E.M. (control condition: n = 70 cells, siCSN1 condition: n = 70 cells, IAA condition: n = 81 cells). Unpaired two-tailed Mann-Whitney test, \*\*\*\*p < 0.0001.

**Supplemental Table S1: Antibodies used in this study**

| <b>Primary Antibodies</b> | <b>Host</b> | <b>Source</b>        | <b>Cat. Number</b> | <b>ICC Dilution</b> | <b>WB Dilution</b> |
|---------------------------|-------------|----------------------|--------------------|---------------------|--------------------|
| 53BP1                     | Rabbit      | Abcam                | ab21083            | 1 in 100            |                    |
| alpha-tubulin             | Mouse       | ThermoFisher         | T9026              |                     | 1 in 1000          |
| CldU                      | Rat         | Abcam                | ab6326             | 1 in 100            |                    |
| CSN1                      | Rabbit      | Fortis Life Sciences | A300-026A          | 1 in 100            | 1 in 1000          |
| CSN3                      | Rabbit      | Fortis Life Sciences | A300-012A          |                     | 1 in 1000          |
| CSN5                      | Rabbit      | Fortis Life Sciences | A300-014A          |                     | 1 in 1000          |
| FANCD2                    | Rabbit      | Novus                | NB100-182          | 1 in 600            |                    |
| FANCM                     | Rabbit      | Abclonal             | A7602              | 1 in 200            |                    |
| H4K12ac                   | Mouse       | Abcam                | ab46983            |                     |                    |
| IdU                       | Mouse       | Becton Dickinson     | 347580             | 1 in 40             |                    |
| SMC5                      | Rabbit      | Novus                | 100-469            |                     | 1 in 400           |

| <b>Secondary Antibodies</b> | <b>Host</b> | <b>Source</b> | <b>Cat. Number</b> | <b>ICC Dilution</b> | <b>WB Dilution</b> |
|-----------------------------|-------------|---------------|--------------------|---------------------|--------------------|
| Mouse IgG, Alexa Fluor 488  | Goat        | Invitrogen    | A-11001            | 1 in 200            |                    |
| Mouse IgG, Alexa Fluor 568  | Goat        | Invitrogen    | A-11031            | 1 in 3000           |                    |
| Rat IgG, Alexa Fluor 568    | Goat        | Invitrogen    | A-11077            | 1 in 200            |                    |
| Rabbit IgG, Alexa Fluor 488 | Goat        | Invitrogen    | A-11008            | 1 in 3000           |                    |
| Rabbit IgG, Alexa Fluor 568 | Goat        | Invitrogen    | A-11011            | 1 in 3000           |                    |
| Mouse IgG, HRP              | Rabbit      | Invitrogen    | 31450              |                     | 1 in 10,000        |
| Rabbit IgG, HRP             | Goat        | Invitrogen    | 31466              |                     | 1 in 10,000        |

**Supplemental Table S2: Statistics and p-value calculations.**

P-values are defined as: \*  $p < 0.05$ , \*\*  $p < 0.005$ , \*\*\*  $p < 0.0005$ , \*\*\*\*  $p < 0.0001$

| Figure Reference               | Significance | p-value | Statistical test                                             | Group       |
|--------------------------------|--------------|---------|--------------------------------------------------------------|-------------|
| <b>Figure 2</b>                |              |         |                                                              |             |
| <b>Figure 2D</b>               |              |         |                                                              |             |
| Control versus IAA             | ****         | <0.0001 | Pearson's Chi-squared test with Yates' continuity correction | Ongoing     |
| Control versus IAA release     | n.s.         | 0.4129  | Pearson's Chi-squared test with Yates' continuity correction | Ongoing     |
| Control versus IAA add         | *            | 0.012   | Pearson's Chi-squared test with Yates' continuity correction | Ongoing     |
| IAA versus IAA release         | ****         | <0.0001 | Pearson's Chi-squared test with Yates' continuity correction | Ongoing     |
| IAA versus IAA add             | ****         | <0.0001 | Pearson's Chi-squared test with Yates' continuity correction | Ongoing     |
| IAA release versus IAA add     | **           | 0.0022  | Pearson's Chi-squared test with Yates' continuity correction | Ongoing     |
| Control versus IAA             | ****         | <0.0001 | Pearson's Chi-squared test with Yates' continuity correction | Stalled     |
| Control versus IAA release     | n.s.         | 0.3179  | Pearson's Chi-squared test with Yates' continuity correction | Stalled     |
| Control versus IAA add         | ***          | 0.0002  | Pearson's Chi-squared test with Yates' continuity correction | Stalled     |
| IAA versus IAA release         | ****         | <0.0001 | Pearson's Chi-squared test with Yates' continuity correction | Stalled     |
| IAA versus IAA add             | ****         | <0.0001 | Pearson's Chi-squared test with Yates' continuity correction | Stalled     |
| IAA release versus IAA add     | **           | 0.0041  | Pearson's Chi-squared test with Yates' continuity correction | Stalled     |
| Control versus IAA             | *            | 0.0315  | Pearson's Chi-squared test with Yates' continuity correction | New origins |
| Control versus IAA release     | n.s.         | 0.3634  | Pearson's Chi-squared test with Yates' continuity correction | New origins |
| Control versus IAA add         | n.s.         | 0.4991  | Pearson's Chi-squared test with Yates' continuity correction | New origins |
| IAA versus IAA release         | *            | 0.008   | Pearson's Chi-squared test with Yates' continuity correction | New origins |
| IAA versus IAA add             | *            | 0.0295  | Pearson's Chi-squared test with Yates' continuity correction | New origins |
| IAA release versus IAA add     | n.s.         | 0.226   | Pearson's Chi-squared test with Yates' continuity correction | New origins |
| <b>Supplemental Figure S1</b>  |              |         |                                                              |             |
| <b>Supplemental Figure S1B</b> |              |         |                                                              |             |
| Control versus IAA             | ****         | <0.0001 | Pearson's Chi-squared test with Yates' continuity correction | Ongoing     |
| Control versus IAA release     | n.s.         | 0.3772  | Pearson's Chi-squared test with Yates' continuity correction | Ongoing     |
| IAA versus IAA release         | ****         | <0.0001 | Pearson's Chi-squared test with Yates' continuity correction | Ongoing     |
| Control versus IAA             | ****         | <0.0001 | Pearson's Chi-squared test with Yates' continuity correction | Stalled     |
| Control versus IAA release     | n.s.         | 0.121   | Pearson's Chi-squared test with Yates' continuity correction | Stalled     |
| IAA versus IAA release         | ****         | <0.0001 | Pearson's Chi-squared test with Yates' continuity correction | Stalled     |
| Control versus IAA             | **           | 0.0028  | Pearson's Chi-squared test with Yates' continuity correction | New origins |
| Control versus IAA release     | *            | 0.0164  | Pearson's Chi-squared test with Yates' continuity correction | New origins |
| IAA versus IAA release         | n.s.         | 0.5354  | Pearson's Chi-squared test with Yates' continuity correction | New origins |

| Figure Reference   | Significance | p-value | Statistical test                      | Group |
|--------------------|--------------|---------|---------------------------------------|-------|
| <u>Figure 3</u>    |              |         |                                       |       |
| <b>Figure 3C</b>   |              |         |                                       |       |
| Control versus IAA | ****         | <0.0001 | Unpaired two-tailed Mann-Whitney test |       |
| <b>Figure 3E</b>   |              |         |                                       |       |
| Control versus IAA | ****         | <0.0001 | Unpaired two-tailed Mann-Whitney test |       |
| <b>Figure 3G</b>   |              |         |                                       |       |
| Control versus IAA | ****         | <0.0001 | Unpaired two-tailed Mann-Whitney test |       |

**Figure 4****Figure 4B**

|                          |      |         |                                                              |         |
|--------------------------|------|---------|--------------------------------------------------------------|---------|
| Control versus mirin     | n.s. | 0.4129  | Pearson's Chi-squared test with Yates' continuity correction | Ongoing |
| Control versus IAA       | **** | <0.0001 | Pearson's Chi-squared test with Yates' continuity correction | Ongoing |
| Control versus mirin+IAA | n.s. | 0.3389  | Pearson's Chi-squared test with Yates' continuity correction | Ongoing |
| Mirin versus IAA         | n.s. | 0.1989  | Pearson's Chi-squared test with Yates' continuity correction | Ongoing |
| Mirin versus mirin+IAA   | n.s. | 0.6811  | Pearson's Chi-squared test with Yates' continuity correction | Ongoing |
| IAA versus mirin+IAA     | **** | <0.0001 | Pearson's Chi-squared test with Yates' continuity correction | Ongoing |
| Control versus mirin     | n.s. | 0.6005  | Pearson's Chi-squared test with Yates' continuity correction | Stalled |
| Control versus IAA       | **** | <0.0001 | Pearson's Chi-squared test with Yates' continuity correction | Stalled |
| Control versus mirin+IAA | n.s. | 0.554   | Pearson's Chi-squared test with Yates' continuity correction | Stalled |
| Mirin versus IAA         | n.s. | 0.4414  | Pearson's Chi-squared test with Yates' continuity correction | Stalled |
| Mirin versus mirin+IAA   | n.s. | 0.2986  | Pearson's Chi-squared test with Yates' continuity correction | Stalled |
| IAA versus mirin+IAA     | **** | <0.0001 | Pearson's Chi-squared test with Yates' continuity correction | Stalled |

**Figure 4D**

|                          |      |         |                                       |
|--------------------------|------|---------|---------------------------------------|
| Control versus IAA       | ***  | 0.0003  | Unpaired two-tailed Mann-Whitney test |
| Control versus mirin     | n.s. | 0.0639  | Unpaired two-tailed Mann-Whitney test |
| Control versus mirin+IAA | *    | 0.0441  | Unpaired two-tailed Mann-Whitney test |
| IAA versus mirin         | **** | <0.0001 | Unpaired two-tailed Mann-Whitney test |
| IAA versus mirin+IAA     | **** | <0.0001 | Unpaired two-tailed Mann-Whitney test |
| mirin versus mirin+IAA   | n.s. | 0.933   | Unpaired two-tailed Mann-Whitney test |

**Figure 4F**

|                          |      |         |                                                              |         |
|--------------------------|------|---------|--------------------------------------------------------------|---------|
| Control versus IAA       | **** | <0.0001 | Pearson's Chi-squared test with Yates' continuity correction | Ongoing |
| Control versus ML216     | *    | 0.0344  | Pearson's Chi-squared test with Yates' continuity correction | Ongoing |
| Control versus ML216+IAA | ***  | 0.0001  | Pearson's Chi-squared test with Yates' continuity correction | Ongoing |
| ML216 versus IAA         | ***  | 0.0003  | Pearson's Chi-squared test with Yates' continuity correction | Ongoing |
| ML216 versus ML216+IAA   | **   | 0.0036  | Pearson's Chi-squared test with Yates' continuity correction | Ongoing |
| IAA versus ML216+IAA     | n.s. | 0.651   | Pearson's Chi-squared test with Yates' continuity correction | Ongoing |
| Control versus ML216     | *    | 0.0411  | Pearson's Chi-squared test with Yates' continuity correction | Stalled |
| Control versus IAA       | **** | <0.0001 | Pearson's Chi-squared test with Yates' continuity correction | Stalled |
| Control versus ML216+IAA | ***  | 0.0002  | Pearson's Chi-squared test with Yates' continuity correction | Stalled |
| ML216 versus IAA         | ***  | 0.0001  | Pearson's Chi-squared test with Yates' continuity correction | Stalled |
| ML216 versus ML216+IAA   | **   | 0.0012  | Pearson's Chi-squared test with Yates' continuity correction | Stalled |
| IAA versus ML216+IAA     | n.s. | 0.1929  | Pearson's Chi-squared test with Yates' continuity correction | Stalled |

**Supplemental Figure S2****Supplemental Figure S2B**

|                          |      |         |                                                              |         |
|--------------------------|------|---------|--------------------------------------------------------------|---------|
| Control versus IAA       | **** | <0.0001 | Pearson's Chi-squared test with Yates' continuity correction | Ongoing |
| Control versus mirin     | n.s. | 0.4441  | Pearson's Chi-squared test with Yates' continuity correction | Ongoing |
| Control versus mirin+IAA | n.s. | 0.3998  | Pearson's Chi-squared test with Yates' continuity correction | Ongoing |
| Mirin versus IAA         | **** | <0.0001 | Pearson's Chi-squared test with Yates' continuity correction | Ongoing |
| Mirin versus mirin+IAA   | n.s. | 0.0808  | Pearson's Chi-squared test with Yates' continuity correction | Ongoing |
| IAA versus mirin+IAA     | **** | <0.0001 | Pearson's Chi-squared test with Yates' continuity correction | Ongoing |
| Control versus IAA       | **** | <0.0001 | Pearson's Chi-squared test with Yates' continuity correction | Stalled |
| Control versus mirin     | n.s. | 0.4122  | Pearson's Chi-squared test with Yates' continuity correction | Stalled |
| Control versus mirin+IAA | n.s. | 0.322   | Pearson's Chi-squared test with Yates' continuity correction | Stalled |
| Mirin versus IAA         | **** | <0.0001 | Pearson's Chi-squared test with Yates' continuity correction | Stalled |
| Mirin versus mirin+IAA   | n.s. | 0.3998  | Pearson's Chi-squared test with Yates' continuity correction | Stalled |
| IAA versus mirin+IAA     | **** | <0.0001 | Pearson's Chi-squared test with Yates' continuity correction | Stalled |

**Supplemental Figure S2D**

|                          |      |         |                                                              |         |
|--------------------------|------|---------|--------------------------------------------------------------|---------|
| Control versus IAA       | **** | <0.0001 | Pearson's Chi-squared test with Yates' continuity correction | Ongoing |
| Control versus PFM01     | n.s. | 0.668   | Pearson's Chi-squared test with Yates' continuity correction | Ongoing |
| Control versus PFM01+IAA | n.s. | 0.3911  | Pearson's Chi-squared test with Yates' continuity correction | Ongoing |
| PFM01 versus IAA         | **** | <0.0001 | Pearson's Chi-squared test with Yates' continuity correction | Ongoing |
| PFM01 versus PFM01+IAA   | n.s. | 0.5112  | Pearson's Chi-squared test with Yates' continuity correction | Ongoing |
| IAA versus PFM01+IAA     | **** | <0.0001 | Pearson's Chi-squared test with Yates' continuity correction | Ongoing |
| Control versus IAA       | **** | <0.0001 | Pearson's Chi-squared test with Yates' continuity correction | Stalled |
| Control versus PFM01     | n.s. | 0.3319  | Pearson's Chi-squared test with Yates' continuity correction | Stalled |
| Control versus PFM01+IAA | n.s. | 0.0919  | Pearson's Chi-squared test with Yates' continuity correction | Stalled |
| PFM01 versus IAA         | **** | <0.0001 | Pearson's Chi-squared test with Yates' continuity correction | Stalled |
| PFM01 versus PFM01+IAA   | n.s. | 0.3988  | Pearson's Chi-squared test with Yates' continuity correction | Stalled |
| IAA versus PFM01+IAA     | **** | <0.0001 | Pearson's Chi-squared test with Yates' continuity correction | Stalled |



| Figure Reference                 | Significance | p-value | Statistical test                                             | Group   |
|----------------------------------|--------------|---------|--------------------------------------------------------------|---------|
| <b>Figure 5</b>                  |              |         |                                                              |         |
| <b>Figure 5C</b>                 |              |         |                                                              |         |
| Control versus IAA               | ****         | <0.0001 | Unpaired two-tailed Mann-Whitney test                        |         |
| <b>Figure 5E</b>                 |              |         |                                                              |         |
| Control versus IAA               | ****         | <0.0001 | Pearson's Chi-squared test with Yates' continuity correction | Ongoing |
| Control versus CSNi              | ****         | <0.0001 | Pearson's Chi-squared test with Yates' continuity correction | Ongoing |
| Control versus CSNi+IAA          | **           | 0.0025  | Pearson's Chi-squared test with Yates' continuity correction | Ongoing |
| Control versus CSNi+CUL4i        | ****         | <0.0001 | Pearson's Chi-squared test with Yates' continuity correction | Ongoing |
| Control versus CSNi+CUL4i+IAA    | ****         | <0.0001 | Pearson's Chi-squared test with Yates' continuity correction | Ongoing |
| IAA versus CSNi                  | n.s.         | 0.5449  | Pearson's Chi-squared test with Yates' continuity correction | Ongoing |
| IAA versus CSNi+IAA              | ***          | 0.0003  | Pearson's Chi-squared test with Yates' continuity correction | Ongoing |
| IAA versus CSNi+CUL4i            | **           | 0.0044  | Pearson's Chi-squared test with Yates' continuity correction | Ongoing |
| IAA versus CSNi+CUL4i+IAA        | n.s.         | 0.6566  | Pearson's Chi-squared test with Yates' continuity correction | Ongoing |
| CSNi versus CSNi+IAA             | ***          | 0.0003  | Pearson's Chi-squared test with Yates' continuity correction | Ongoing |
| CSNi versus CSNi+CUL4i           | n.s.         | 0.3861  | Pearson's Chi-squared test with Yates' continuity correction | Ongoing |
| CSNi versus CSNi+CUL4i+IAA       | *            | 0.0178  | Pearson's Chi-squared test with Yates' continuity correction | Ongoing |
| CSNi+IAA versus CSNi+CUL4i       | ***          | 0.0002  | Pearson's Chi-squared test with Yates' continuity correction | Ongoing |
| CSNi+IAA versus CSNi+CUL4i+IAA   | **           | 0.0032  | Pearson's Chi-squared test with Yates' continuity correction | Ongoing |
| CSNi+CUL4i versus CSNi+CUL4i+IAA | **           | 0.0031  | Pearson's Chi-squared test with Yates' continuity correction | Ongoing |
| Control versus IAA               | ****         | <0.0001 | Pearson's Chi-squared test with Yates' continuity correction | Stalled |
| Control versus CSNi              | ****         | <0.0001 | Pearson's Chi-squared test with Yates' continuity correction | Stalled |
| Control versus CSNi+IAA          | **           | 0.0022  | Pearson's Chi-squared test with Yates' continuity correction | Stalled |
| Control versus CSNi+CUL4i        | ****         | <0.0001 | Pearson's Chi-squared test with Yates' continuity correction | Stalled |
| Control versus CSNi+CUL4i+IAA    | ***          | 0.0002  | Pearson's Chi-squared test with Yates' continuity correction | Stalled |
| IAA versus CSNi                  | *            | 0.0414  | Pearson's Chi-squared test with Yates' continuity correction | Stalled |
| IAA versus CSNi+IAA              | **           | 0.0041  | Pearson's Chi-squared test with Yates' continuity correction | Stalled |
| IAA versus CSNi+CUL4i            | ****         | <0.0001 | Pearson's Chi-squared test with Yates' continuity correction | Stalled |
| IAA versus CSNi+CUL4i+IAA        | n.s.         | 0.4412  | Pearson's Chi-squared test with Yates' continuity correction | Stalled |
| CSNi versus CSNi+IAA             | ****         | <0.0001 | Pearson's Chi-squared test with Yates' continuity correction | Stalled |
| CSNi versus CSNi+CUL4i           | n.s.         | 0.6615  | Pearson's Chi-squared test with Yates' continuity correction | Stalled |
| CSNi versus CSNi+CUL4i+IAA       | *            | 0.0241  | Pearson's Chi-squared test with Yates' continuity correction | Stalled |
| CSNi+IAA versus CSNi+CUL4i       | ***          | 0.0002  | Pearson's Chi-squared test with Yates' continuity correction | Stalled |
| CSNi+IAA versus CSNi+CUL4i+IAA   | **           | 0.0032  | Pearson's Chi-squared test with Yates' continuity correction | Stalled |
| CSNi+CUL4i versus CSNi+CUL4i+IAA | **           | 0.0041  | Pearson's Chi-squared test with Yates' continuity correction | Stalled |

| Figure Reference                   | Significance | p-value | Statistical test                                             | Group   |
|------------------------------------|--------------|---------|--------------------------------------------------------------|---------|
| <b>Figure 5G</b>                   |              |         |                                                              |         |
| Control versus IAA                 | ****         | <0.0001 | Pearson's Chi-squared test with Yates' continuity correction | Ongoing |
| Control versus CUL4i               | ****         | <0.0001 | Pearson's Chi-squared test with Yates' continuity correction | Ongoing |
| Control versus CUL4i+IAA           | ****         | <0.0001 | Pearson's Chi-squared test with Yates' continuity correction | Ongoing |
| Control versus mirin+CUL4i         | *            | 0.0377  | Pearson's Chi-squared test with Yates' continuity correction | Ongoing |
| Control versus mirin+CUL4i+IAA     | n.s.         | 0.1442  | Pearson's Chi-squared test with Yates' continuity correction | Ongoing |
| IAA versus CUL4i                   | n.s.         | 0.1333  | Pearson's Chi-squared test with Yates' continuity correction | Ongoing |
| IAA versus CUL4i+IAA               | *            | 0.0098  | Pearson's Chi-squared test with Yates' continuity correction | Ongoing |
| IAA versus mirin+CUL4i             | ***          | 0.0002  | Pearson's Chi-squared test with Yates' continuity correction | Ongoing |
| IAA versus mirin+CUL4i+IAA         | ****         | <0.0001 | Pearson's Chi-squared test with Yates' continuity correction | Ongoing |
| CUL4i versus CUL4i+IAA             | n.s.         | 0.3122  | Pearson's Chi-squared test with Yates' continuity correction | Ongoing |
| CUL4i versus mirin+CUL4i           | ****         | <0.0001 | Pearson's Chi-squared test with Yates' continuity correction | Ongoing |
| CUL4i versus mirin+CUL4i+IAA       | ****         | <0.0001 | Pearson's Chi-squared test with Yates' continuity correction | Ongoing |
| CUL4i+IAA versus mirin+CUL4i       | ****         | <0.0001 | Pearson's Chi-squared test with Yates' continuity correction | Ongoing |
| CUL4i+IAA versus mirin+CUL4i+IAA   | ****         | <0.0001 | Pearson's Chi-squared test with Yates' continuity correction | Ongoing |
| mirin+CUL4i versus mirin+CUL4i+IAA | *            | 0.0473  | Pearson's Chi-squared test with Yates' continuity correction | Ongoing |
| Control versus IAA                 | ****         | <0.0001 | Pearson's Chi-squared test with Yates' continuity correction | Stalled |
| Control versus CUL4i               | ****         | <0.0001 | Pearson's Chi-squared test with Yates' continuity correction | Stalled |
| Control versus CUL4i+IAA           | ****         | <0.0001 | Pearson's Chi-squared test with Yates' continuity correction | Stalled |
| Control versus mirin+CUL4i         | *            | 0.0169  | Pearson's Chi-squared test with Yates' continuity correction | Stalled |
| Control versus mirin+CUL4i+IAA     | n.s.         | 0.3332  | Pearson's Chi-squared test with Yates' continuity correction | Stalled |
| IAA versus CUL4i                   | n.s.         | 0.3132  | Pearson's Chi-squared test with Yates' continuity correction | Stalled |
| IAA versus CUL4i+IAA               | *            | 0.0311  | Pearson's Chi-squared test with Yates' continuity correction | Stalled |
| IAA versus mirin+CUL4i             | ***          | 0.0002  | Pearson's Chi-squared test with Yates' continuity correction | Stalled |
| IAA versus mirin+CUL4i+IAA         | ****         | <0.0001 | Pearson's Chi-squared test with Yates' continuity correction | Stalled |
| CUL4i versus CUL4i+IAA             | n.s.         | 0.1146  | Pearson's Chi-squared test with Yates' continuity correction | Stalled |
| CUL4i versus mirin+CUL4i           | ****         | <0.0001 | Pearson's Chi-squared test with Yates' continuity correction | Stalled |
| CUL4i versus mirin+CUL4i+IAA       | ****         | <0.0001 | Pearson's Chi-squared test with Yates' continuity correction | Stalled |
| CUL4i+IAA versus mirin+CUL4i       | ****         | <0.0001 | Pearson's Chi-squared test with Yates' continuity correction | Stalled |
| CUL4i+IAA versus mirin+CUL4i+IAA   | ****         | <0.0001 | Pearson's Chi-squared test with Yates' continuity correction | Stalled |
| mirin+CUL4i versus mirin+CUL4i+IAA | *            | 0.0415  | Pearson's Chi-squared test with Yates' continuity correction | Stalled |

| Figure Reference    | Significance | p-value | Statistical test                      | Group |
|---------------------|--------------|---------|---------------------------------------|-------|
| <u>Figure 6</u>     |              |         |                                       |       |
| <b>Figure 6C</b>    |              |         |                                       |       |
| Control versus IAA  | ****         | <0.0001 | Unpaired two-tailed Mann-Whitney test |       |
| Control versus CSNi | n.s.         | 0.0787  | Unpaired two-tailed Mann-Whitney test |       |
| CSNi versus IAA     | **           | 0.002   | Unpaired two-tailed Mann-Whitney test |       |
| <b>Figure 6E</b>    |              |         |                                       |       |
| Control versus IAA  | ****         | <0.0001 | Unpaired two-tailed Mann-Whitney test |       |
| Control versus CSNi | n.s.         | 0.3718  | Unpaired two-tailed Mann-Whitney test |       |
| CSNi versus IAA     | ****         | <0.0001 | Unpaired two-tailed Mann-Whitney test |       |
